# Supplementary material for: Gender effects on quality of life and symptom burden in patients with lung cancer: results from a prospective, cross-cultural, multi-center study
Source: PubMed Central journal article supplement — J Thorac Dis. 2020 Aug;12(8):4253–61. doi: 10.21037/jtd-20-1054 (PMC7475557; doi:10.21037/jtd-20-1054), 2020-08
Supplement: jtd-12-08-4253-dss.pdf [file jtd-12-08-4253-dss.pdf]

## Data Sharing Statement

|                     |                                                                                                                                                    |                                                                                                                  |
|---------------------|----------------------------------------------------------------------------------------------------------------------------------------------------|------------------------------------------------------------------------------------------------------------------|
| <b>Article Info</b> | Available at <a href="http://dx.doi.org/10.21037/jtd-20-1054">http://dx.doi.org/10.21037/jtd-20-1054</a> .                                         |                                                                                                                  |
| <b>Item</b>         | <b>Question</b>                                                                                                                                    | <b>Authors' Response<br/>(place "-" if not applicable)</b>                                                       |
| 1                   | Would you like to share data collected for your study to others?                                                                                   | Yes                                                                                                              |
| 2                   | If not, would you like to share the reason for your decision?                                                                                      | -                                                                                                                |
| 3                   | What data in particular will be shared?                                                                                                            | Data on quality of life.                                                                                         |
| 4                   | Any other documents will be share? Such as study protocol, statistical analysis plan, informed consent form, clinical study report, analytic code. | Phase III report on module development to the EORTC.                                                             |
| 5                   | When will data availability begin?                                                                                                                 | From the publication date.                                                                                       |
| 6                   | When will data availability end?                                                                                                                   | Two years within publication date.                                                                               |
| 7                   | To whom will you share the data?                                                                                                                   | To researchers who submit a sound research proposal on how to use the data.                                      |
| 8                   | For what type of analysis or purpose?                                                                                                              | Analyses on quality of life aspects according to the researcher's proposal.                                      |
| 9                   | How or where can the data/documents be obtained?                                                                                                   | Emails should be directed to:<br>michael.koller@ukr.de                                                           |
| 10                  | Any other restrictions?                                                                                                                            | We may balance the potential benefits and risks for each request and then provide the data that could be shared. |
